# Supplementary material for: Solvent-assisted sulfur vacancy engineering method in MoS2 for a neuromorphic synaptic memristor
Source: Royal Society of Chemistry journal article supplement (doi:10.1039/d3nh00201b), 2023-01-01
Supplement: d3nh00201b1.pdf [file d3nh00201b1.pdf]

## Electronic Supporting Information

### Solvent-assisted sulfur vacancy engineering method in MoS<sub>2</sub> for neuromorphic synaptic memristor

Jiyeon Kim,<sup>a,‡</sup> Changik Im,<sup>b,‡</sup> Chan Lee,<sup>c</sup> Jinwoo Hwang,<sup>d</sup> Hyoik Jang,<sup>d</sup> Jae Hak Lee,<sup>b,e</sup> Minho Jin,<sup>b</sup> Haeyeon Lee,<sup>c</sup> Junyoung Kim,<sup>f</sup> Junho Sung,<sup>d</sup> Youn Sang Kim<sup>\*a,b,c,g</sup> and Eunho Lee<sup>\*d</sup>

<sup>a</sup> Department of Applied Bioengineering, Graduate School of Convergence Science and Technology, Seoul National University, Gwanak-ro 1, Gwanak-gu, Seoul 08826, Republic of Korea

<sup>b</sup> Program in Nano Science and Technology, Graduate School of Convergence Science and Technology, Seoul National University, Gwanak-ro 1, Gwanak-gu, Seoul, 08826, Republic of Korea

<sup>c</sup> Department of Chemical and Biological Engineering, College of Engineering, Seoul National University, Gwanak-ro 1, Gwanak-gu, Seoul, 08826, Republic of Korea

<sup>d</sup> Department of Chemical Engineering, Kumoh National Institute of Technology, 61 Daehak-ro, Gumi-si, Gyeongsangbuk-do, 39177, Republic of Korea

<sup>e</sup> Samsung Display Company, Ltd., 1 Samsung-ro, Giheung-gu, Yongin-si, Gyeonggi-do, 17113, Republic of Korea

<sup>f</sup> Inspection Business Unit (IBU), Onto Innovation, 4900 W 78th St, Bloomington, MN 55435, United States

<sup>g</sup> Advanced Institutes of Convergence Technology, Gwanggyo-ro 145, Yeongtong-gu, Suwon, 16229, Republic of Korea

<sup>‡</sup> These authors contributed equally

\*Corresponding author. E-mail: leeeh@kumoh.ac.kr (Eunho Lee),

younskim@snu.ac.kr (Youn Sang Kim)

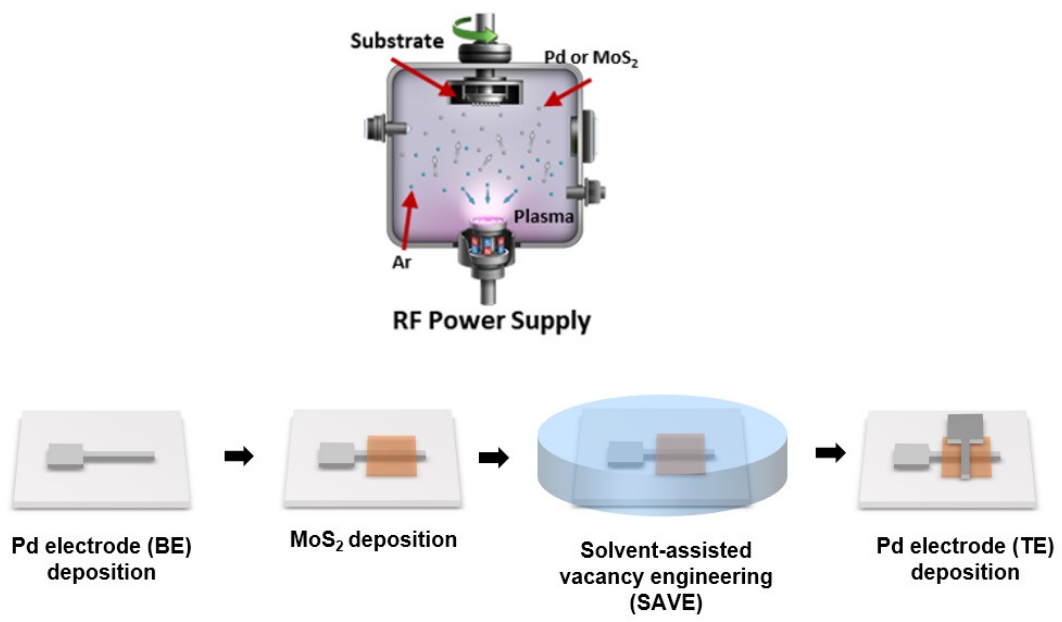

**Fig. S1** An illustration of the MoS<sub>2</sub> thin film deposition and synaptic memristor (Pd/MoS<sub>2</sub>/Pd) fabrication process.

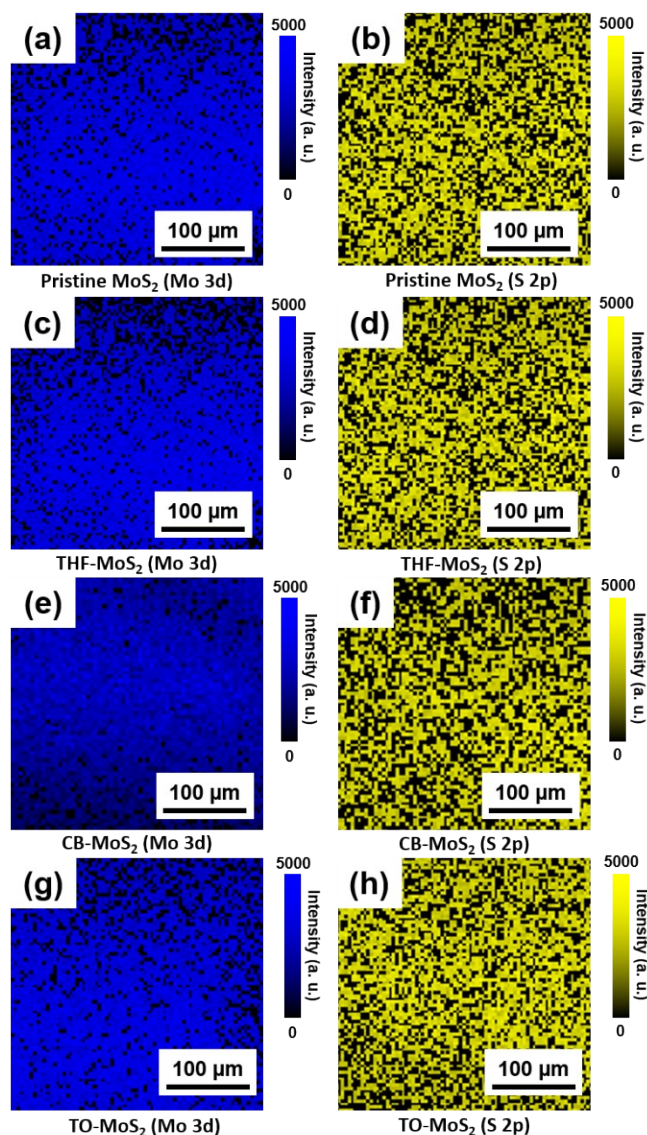

**Fig. S2** Energy-dispersive X-ray spectroscopy (EDX) mapping ( $300\ \mu\text{m} \times 300\ \mu\text{m}$ ) to confirm the surface film quality and uniformity of the Mo and S atoms. (a) Pristine-MoS<sub>2</sub> (Mo 3d), (b) pristine-MoS<sub>2</sub> (S 2p), (c) THF-MoS<sub>2</sub> (Mo 3d), (d) THF-MoS<sub>2</sub> (S 2p), (e) CB-MoS<sub>2</sub> (Mo 3d), (f) CB-MoS<sub>2</sub> (S 2p), (g) TO-MoS<sub>2</sub> (Mo 3d), and (h) TO-MoS<sub>2</sub> (S 2p)

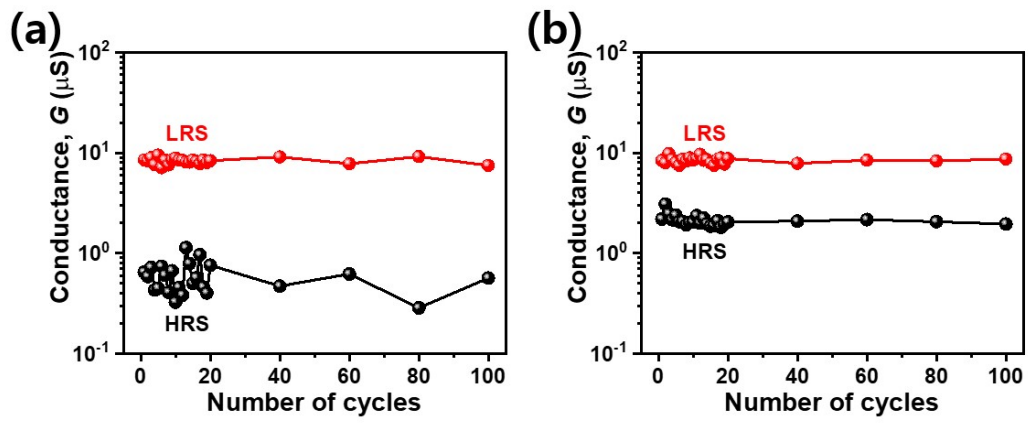

**Fig. S3** The measured conductance of (a) CB-MoS<sub>2</sub> and (b) TO-MoS<sub>2</sub> synaptic memristor at HRS and LRS maintained for 100 cycles.

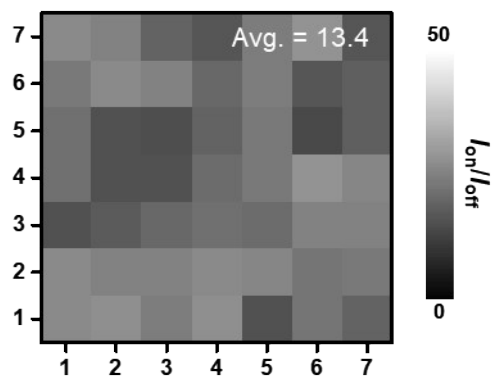

**Fig. S4**  $I_{on}/I_{off}$  mapping image of 49 THF-MoS<sub>2</sub> memristors.

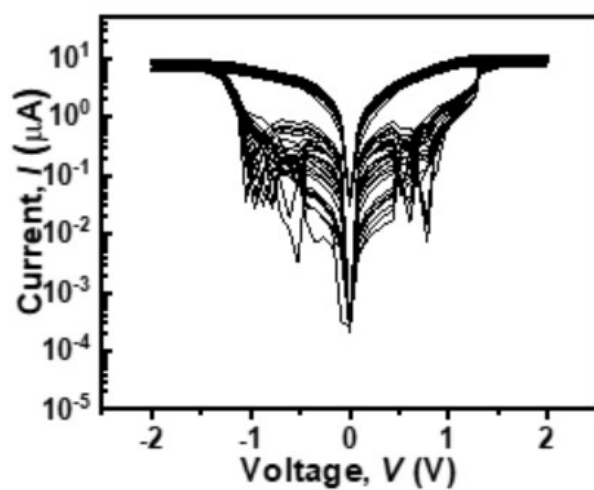

**Fig. S5** 30 cycles  $I$ - $V$  repeatability test of THF-MoS<sub>2</sub> memristor.

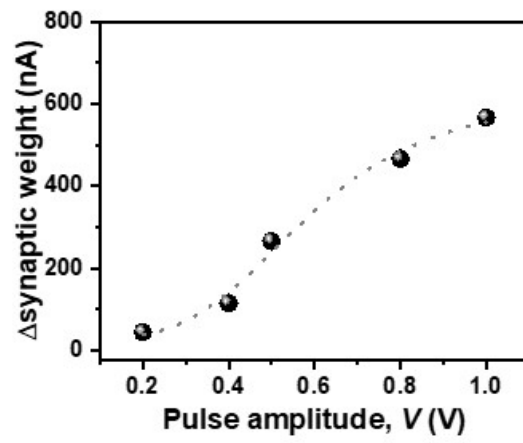

**Fig. S6** Synaptic weight change depending on pulse amplitudes.

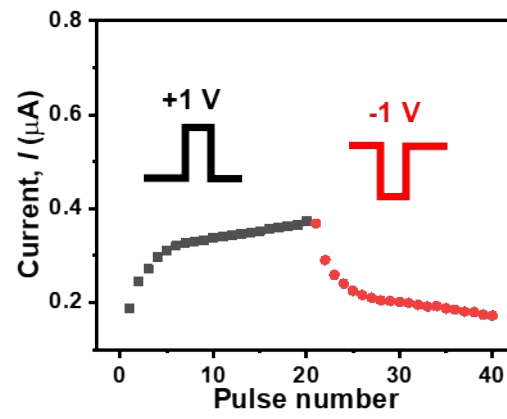

**Fig. S7** Long-term potentiation and long-term depression pristine MoS<sub>2</sub> memristor ( $V_{LTP} = +1$  V for 20 ms,  $V_{LTD} = -1$  V for 20 ms).



|                          | <b>MoS<sub>2</sub></b> | <b>Tetrahydrofuran<br/>(THF)</b> | <b>Chlorobenzene<br/>(CB)</b> | <b>Toluene<br/>(TO)</b> |
|--------------------------|------------------------|----------------------------------|-------------------------------|-------------------------|
| HSP (MPa <sup>-1</sup> ) | 18.54-24.02            | 19.46                            | 19.58                         | 18.16                   |

**Table S1** Hansen solubility parameters (HSPs) of MoS<sub>2</sub>, tetrahydrofuran (THF), chlorobenzene (CB), and toluene (TO)

|                | <b>Tetrahydrofuran (THF)</b> | <b>Chlorobenzene (CB)</b> | <b>Toluene (TO)</b> |
|----------------|------------------------------|---------------------------|---------------------|
| Polarity index | 4.0                          | 2.7                       | 2.4                 |

**Table S2** Polarity index of tetrahydrofuran (THF), chlorobenzene (CB), and toluene (TO)

|                                         | <b>Tetrahydrofuran (THF)</b> | <b>Chlorobenzene (CB)</b> | <b>Toluene (TO)</b> |
|-----------------------------------------|------------------------------|---------------------------|---------------------|
| $I_{\text{on}}/I_{\text{off}}$          | $1.38 \times 10^2$           | $1.67 \times 10^2$        | $7.69 \times 10^1$  |
| $V_{\text{SET}} (V_{\text{RESET}})$ [V] | $1.25 \pm 0.21$              | $1.78 \pm 0.29$           | $1.53 \pm 0.25$     |
|                                         | $(-1.36 \pm 0.23)$           | $(-1.41 \pm 0.25)$        | $(-1.58 \pm 0.21)$  |

**Table S3**  $V_{\text{SET}}$ ,  $V_{\text{RESET}}$  and  $I_{\text{on}}/I_{\text{off}}$  of THF-MoS<sub>2</sub>, CB-MoS<sub>2</sub>, TO-MoS<sub>2</sub> synaptic memristor.

| <b>Pulse #</b>            | <b>#3</b> | <b>#10</b> | <b>#18</b> |
|---------------------------|-----------|------------|------------|
| <b>Normalized current</b> |           |            |            |
| LTP                       | 0.49      | 0.77       | 0.96       |
| LTD                       | 0.82      | 0.51       | 0.30       |

**Table S4** Normalized current values in potentiation and depression depending on pulse number.
